# Supplementary material for: Electroconvulsive therapy induces rapid microstructural and macrostructural changes, but microstructural changes are longer-lasting
Source: Research Square preprint supplement (doi:10.21203/rs.3.rs-6295387/v1), 2025-05-08
Supplement: Supplementary file 2 [file ff9e98bfc5abff093e2fae26.xlsx]

## Sheet: Blad1
	Test for cognitive outcome			Test for changes in MRI data during the ECT course (T1.1, 1.2, 1.3)	Test for changes in MRI data at T2 and T3
	ECT patients	Healthy controls		ECT patients	ECT patients	Healthy controls
Variables	With available outcome data n = 72	With available outcome data n = 26	Significance	With available MRI data during ECT course n = 19	With available MRI data after ECT course n = 30	With available MRI data after ECT course n = 20	Significance	Used test
Demographic variables
Age in years, mean (SD)	52.3 (15.3)	53.0 (15.3)	.84	48.5 (15.3)	45.7 (13.3)	53.0 (14.4)	.08	Unpaired T test
Female sex, n (%)	42 (58.3)	15 (57.7)	.95	13 (68.4)	19 (63.3)	11 (55.0)	.55	Chi-squared test
Education level, median (IQR)	5 (1.0)	6 (1.75)	.13	5 (1)	5 (1.0)	6 (1.25)	.20	Fisher's exact
Diagnosis of MDD, n (%)	58 (80.6)	NA		14 (73.7)	27 (90)	NA
Diagnosis of BD, n (%)	12 (16.7)	NA		4 (21.1)	3 (10)	NA
Diagnosis of SA, n (%)	2 (2.8)	NA		1 (5.3)	0 (0)	NA
Psychotic subtype, n (%)	15 (20.8)	NA		4 (21.1)	5 (16.7)	NA
ECT variables
Total number of ECT-sessions during course, median (IQR)	16 (14)	NA		13.5 (8)	17 (13.3)	NA
Right unilateral electrode position at end ECT-course, n, (%)	17 (23.6)	NA		6 (31.6)	7 (23.3)	NA
Remission of depression after ECT, n (%)	24 (34.3)	NA		8 (44.4)	10 (33.3)	NA
Change in HDRS score, mean (SD)	.-10.1 (8.8)	NA		.-9.6 (6.9)	.-9.8 (8.2)	NA
Table 1. Population characteristics
